# Supplementary material for: VIP activates primordial follicles of rat through ERK-mTOR pathway in tissue culture
Source: PubMed Central journal article supplement (PMC6433003; doi:10.1530/rep-18-0466), 2019-02-26
Supplement: supplementary_figure_1.pdf [file supplementary_figure_1.pdf]

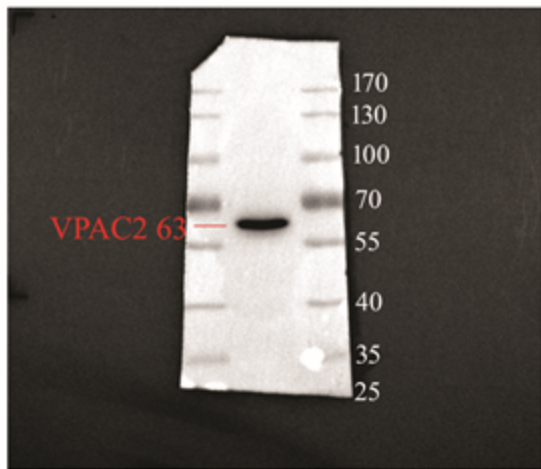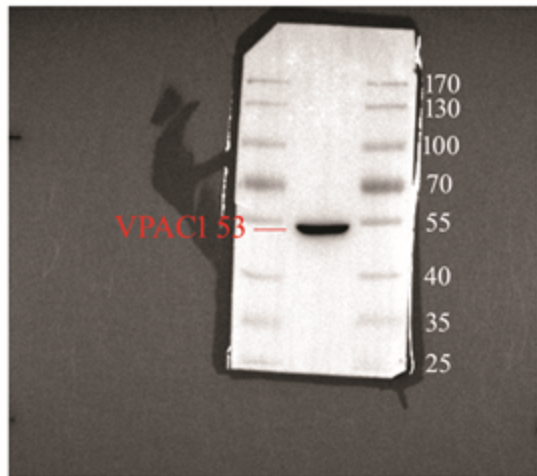

Supplemental figure. The western blot showing specificity of antibodies for VPAC1 and VPAC2.
